# Supplementary material for: General design of hollow porous CoFe2O4nanocubes from metal–organic frameworks with extraordinary lithium storage
Source: Royal Society of Chemistry journal article supplement (doi:10.1039/c4nr04422c), 2014-01-01
Supplement: c4nr04422c1.pdf [file c4nr04422c1.pdf]

### Electronic Supplementary Information

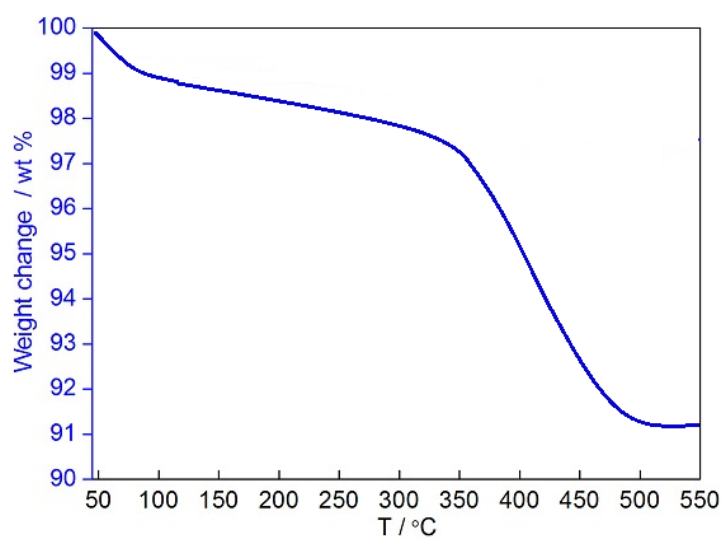

**Fig. S1** TG analysis of the carbon content of the prepared  $\text{CoFe}_2\text{O}_4$  nanocubes sample after calcinations.

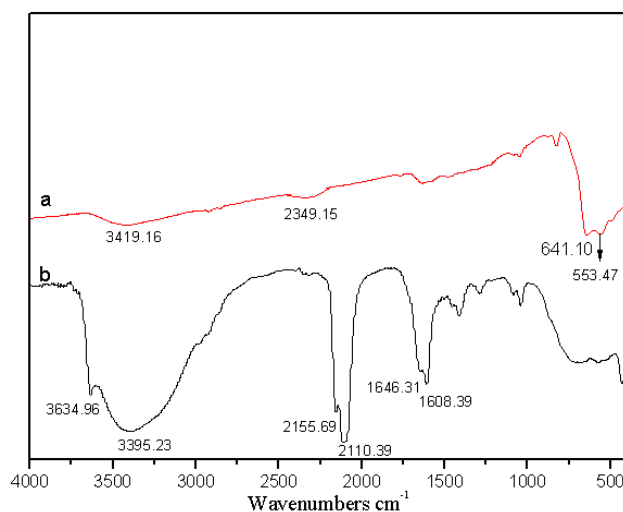

**Fig. S2** FTIR spectra of hollow  $\text{CoFe}_2\text{O}_4$  nanocubes and its precursor corresponding to curve a and b, respectively.

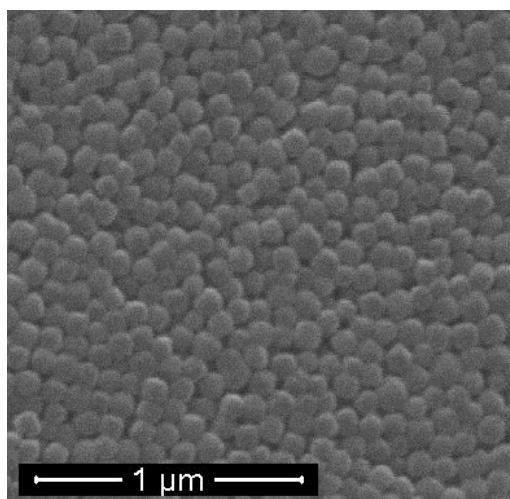

**Fig. S3** SEM image of as-synthesized hollow  $\text{NiFe}_2\text{O}_4$  nanocubes.

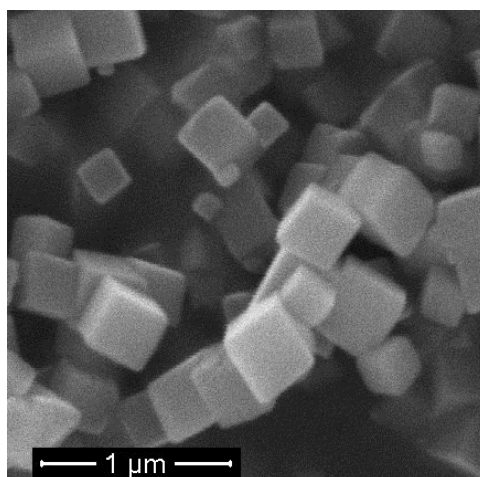

**Fig. S4** SEM image of as-synthesized hollow  $\text{ZnCo}_2\text{O}_4$  nanocubes.

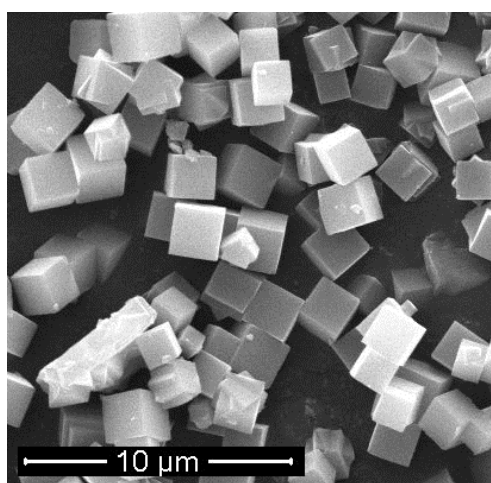

**Fig. S5** SEM image of as-synthesized hollow  $\text{NiCo}_2\text{O}_4$  nanocubes.
